# Supplementary material for: Combined Transcriptome and Proteome Analysis of Anthers of AL-type Cytoplasmic Male Sterile Line and Its Maintainer Line Reveals New Insights into Mechanism of Male Sterility in Common Wheat
Source: PubMed Central journal article supplement (PMC8718765; doi:10.3389/fgene.2021.762332), 2021-12-17
Supplement: Image1.pdf [file Image1.pdf]

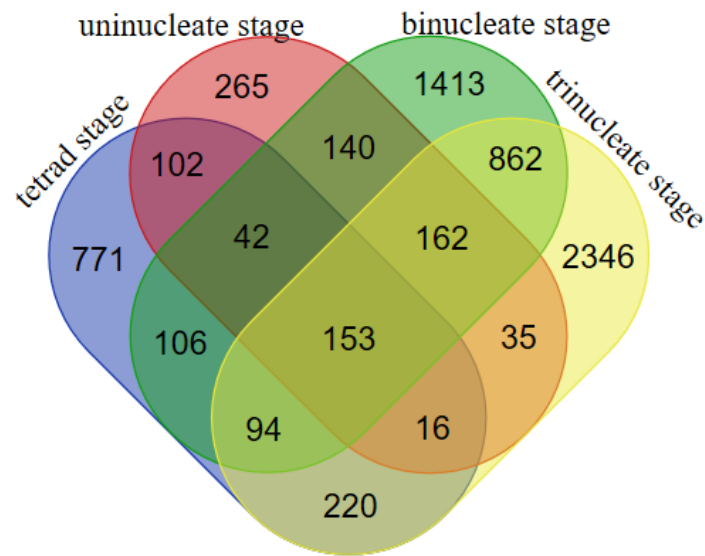

**Figure S1** Venn map of differentially expressed transcripts of AL18A and AL18B at different anther development stages

The differentially expressed transcripts were: 1,505 in the tetrad stage; 916 in uninucleate stage; 2,973 in binucleate stage; 3,889 in trinucleate stage.
